# Supplementary material for: A novel network-based method identifies a cuproplasia-related pan-cancer gene signature to predict patient outcome
Source: Hum Genet. 2024 Apr 20;143(9-10):1145–62. doi: 10.1007/s00439-024-02673-2 (PMC11485146; doi:10.1007/s00439-024-02673-2)
Supplement: Supplementary file 1 — Additional file 1. Supplementary table 1 The 23 cancer types utilised in our analysis with corresponding number of samples obtained from TCGA (‘TCGA primary tumour’) and GTEx (‘GTEx normal tissue’). Supplementary Table 2. Copper related gene sets from the Molecular Signatures Database. Supplementary Table 3. 133-gene list of copper-metabolism related genes. Supplementary Table 4. Numbers of differentially expressed genes (DEGs) in cancer types. Supplementary Table 5. Sets of critical cuproplasia-related genes. Supplementary Table 6. Univariate Cox regression analysis for 13 CCGs identified in LGG. [file 439_2024_2673_MOESM1_ESM.xlsx]

## Sheet: Information
	Human Genetics journal
	A novel network-based method identifies a cuproplasia-related pan-cancer gene signature to predict patient outcome
	Vu Viet Hoang Pham1,2, Toni Rose Jue1,2, Jessica Bell1,2, Fabio Luciani2, Filip Michniewicz2, Giuseppe Cirillo3, Linda Vahdat4, Chelsea Mayoh1,5,+, and Orazio Vittorio1,2,+,*
	1 Children’s Cancer Institute, Lowy Cancer Research Centre, UNSW, Kensington, NSW, Australia
	2 School of Biomedical Sciences, UNSW Sydney, Kensington, NSW, Australia
	3 Department of Pharmacy, Health and Nutritional Sciences, University of Calabria, Rende, Italy
	4 Dartmouth–Hitchcock Medical Center: Lebanon, New Hampshire, US
	5 School of Clinical Medicine, UNSW Medicine & Health, UNSW Sydney, Kensington, NSW, Australia
	+ Joint senior authors
	* To whom correspondence should be addressed. Tel: +61 2 9385 1557; Email: orazio.vittorio@unsw.edu.au

## Sheet: Supplementary Table 1
Supplementary Table 1. The 23 cancer types utilised in our analysis with corresponding number of samples obtained from TCGA (‘TCGA primary tumour’) and GTEx (‘GTEx normal tissue’), and primary sites where complimentary GTEx normal tissue samples can be found for TCGA tumor samples.
Code of cancer type	Cancer type	TCGA primary tumor	GTEx normal tissue	Primary site
ACC	Adrenocortical carcinoma	76	126	Adrenal Gland
AML	Acute myeloid leukemia	172	444	Blood
BLCA	Bladder Urothelial Carcinoma	144	9	Bladder
BRCA	Breast invasive carcinoma	1212	178	Breast
COAD	Colon adenocarcinoma	279	307	Colon
ESCA	Esophageal carcinoma	179	652	Esophagus
GBM	Glioblastoma multiforme	166	105	Brain
KICH	Kidney Chromophobe	91	28	Kidney
KIRC	Kidney renal clear cell carcinoma	508	28	Kidney
KIRP	Kidney renal papillary cell carcinoma	189	28	Kidney
LGG	Brain Lower Grade Glioma	348	105	Brain
LIHC	Liver hepatocellular carcinoma	239	110	Liver
LUAD	Lung adenocarcinoma	274	288	Lung
LUSC	Lung squamous cell carcinoma	192	288	Lung
OVCA	Serous ovarian carcinoma	418	88	Ovary
PAAD	Pancreatic Cancer	154	167	Pancreas
PCPG	Pheochromocytoma and Paraganglioma	179	126	Adrenal Gland
PRAD	Prostate adenocarcinoma	373	100	Prostate
SKCM	Skin Cutaneous Melanoma	331	811	Skin
STAD	Stomach adenocarcinoma	409	174	Stomach
THCA	Thyroid carcinoma	560	279	Thyroid
UCEC	Uterine Corpus Endometrial Carcinoma	182	78	Uterus
UCS	Uterine Carcinosarcoma	57	78	Uterus

## Sheet: Supplementary Table 2
Supplementary Table 2. Copper related gene sets from Molecular Signatures Database v2022.1.Hs.
Gene set	Brief description	Collection
WP_COPPER_HOMEOSTASIS	Copper homeostasis	Derived from the WikiPathways pathway database which captures the collective knowledge represented in biological pathways by means of crowd sourcing
HP_DECREASED_CIRCULATING_COPPER_CONCENTRATION	Decreased circulating copper concentration	Derived from the Human Phenotype ontology which provides a standardized vocabulary of phenotypic abnormalities encountered in human disease and is developed using the medical literature, Orphanet (a resource on rare diseases), DECIPHER (a database of genomic variation and phenotype in humans), and OMIM (a catalog of human genes and genetic disorders)
HP_ABNORMAL_CIRCULATING_COPPER_CONCENTRATION	Abnormal circulating copper concentration
GOMF_COPPER_ION_TRANSMEMBRANE_TRANSPORTER_ACTIVITY	Enables the transfer of copper (Cu) ions from one side of a membrane to the other	Derived from the GO Molecular Function ontology, and GO is a collaborative effort to develop and use ontologies to support biologically meaningful annotation of genes and their products
GOMF_COPPER_ION_BINDING	Binding to a copper (Cu) ion
GOMF_COPPER_CHAPERONE_ACTIVITY	Directly binding to and delivering copper ions to a target protein
GOBP_RESPONSE_TO_COPPER_ION	Any process that results in a change in state or activity of a cell or an organism (in terms of movement, secretion, enzyme production, gene expression, etc.) as a result of a copper ion stimulus	Derived from the GO Biological Process ontology
GOBP_DETOXIFICATION_OF_COPPER_ION	Any process that reduces or removes the toxicity of copper ion. These include transport of copper away from sensitive areas and to compartments or complexes whose purpose is sequestration of copper ion
GOBP_COPPER_ION_TRANSPORT	The directed movement of copper (Cu) ions into, out of or within a cell, or between cells, by means of some agent such as a transporter or pore
GOBP_COPPER_ION_TRANSMEMBRANE_TRANSPORT	The directed movement of copper cation across a membrane
GOBP_COPPER_ION_IMPORT	The directed movement of copper ions into a cell or organelle
GOBP_COPPER_ION_HOMEOSTASIS	Any process involved in the maintenance of an internal steady state of copper ions within an organism or cell
GOBP_CELLULAR_RESPONSE_TO_COPPER_ION	Any process that results in a change in state or activity of a cell (in terms of movement, secretion, enzyme production, gene expression, etc.) as a result of a copper ion stimulus
GOBP_CELLULAR_COPPER_ION_HOMEOSTASIS	Cellular copper ion homeostasis

## Sheet: Supplementary Table 3
Supplementary Table 3. 133-gene list of copper-metabolism related genes.
Copper metabolism related genes
XIAP
XAF1
TYR
TP53
TMPRSS6
TFRC
SUMF1
STEAP4
STEAP3
STEAP2
STEAP1
SPATA5
SP1
SORD
SOD3
SOD1
SNCG
SNCB
SNCA
SNAI3
SLC31A2
SLC31A1
SLC11A2
SCO2
SCO1
S100A5
S100A13
S100A12
RNF7
PTEN
PRNP
PRND
PIK3CA
PARK7
PAM
P2RX4
OR5AR1
NFE2L2
MTF2
MTF1
MTCO2P12
MT4
MT3
MT2A
MT1X
MT1M
MT1L
MT1JP
MT1HL1
MT1H
MT1G
MT1F
MT1E
MT1DP
MT1B
MT1A
MT-CO2
MT-CO1
MOXD2P
MOXD1
MMGT1
MDM2
MAPT
MAP1LC3A
LOXL4
LOXL3
LOXL2
LOXL1
LOX
LCAT
LACC1
JUN
IL1A
HSF1
HEPHL1
HEPH
HAMP
GSK3B
GPC1
FOXO3
FOXO1
FKBP4
F8
F5
DCT
DBH
DAXX
CYP1A1
CUTC
CUTA
CP
COX19
COX17
COX11
COMMD1
COG2
COA6
CDK1
CCS
CCND1
CCDC22
CASP3
BECN1
BACE1
ATP7B
ATP7A
ATP6V0A2
ATP6AP1
ATP5F1D
ATP13A2
ATOX1
ARF1
AQP2
AQP1
APP
APOA4
APC
AP1S1
AP1B1
AOC3
AOC2
AOC1
ANKRD9
ANG
ALB
AKT1
ADNP
ADAM9
ADAM17
ADAM10
ACR
ABCB6
AANAT

## Sheet: Supplementary Table 4
Supplementary Table 4. Numbers of differentially expressed genes (DEGs) in cancer types.
Cancer type	Number of DEGs
ACC	7232
AML	14025
BLCA	7716
BRCA	11013
COAD	11994
ESCA	10411
GBM	11942
KICH	10270
KIRC	10373
KIRP	9115
LGG	9976
LIHC	6835
LUAD	10309
LUSC	13180
OVCA	13748
PAAD	10962
PCPG	9435
PRAD	9919
SKCM	12081
STAD	10111
THCA	8856
UCEC	13362
UCS	12065

## Sheet: Supplementary Table 5
Supplementary Table 5. Sets of critical cuproplasia-related genes.
	Critical cuproplasia-related genes
57 critical cuproplasia-related genes for all cancer types	CDK1, ALB, AP1S1, CASP3, MAP1LC3A, SNCA, TMPRSS6, MAPT, GSK3B, JUN, APP, CYP1A1, COX17, XIAP, TP53, FOXO1, COA6, ARF1, GPC1, AOC3, SORD, PRNP, F5, ATP7A, SP1, MT-CO1, DBH, SLC11A2, ANG, S100A12, ATP6AP1, ADAM10, MT-CO2, CP, BACE1, PRND, AQP1, MT1X, IL1A, XAF1, ANKRD9, APC, LOXL1, ATOX1, ADAM17, STEAP3, MMGT1, AP1B1, CCND1, AANAT, SPATA5, COMMD1, F8, SUMF1, HEPH, PARK7, LCAT
40 critical cuproplasia-related genes in the results of different cancer types	CDK1, ALB, AP1S1, CASP3, MAP1LC3A, SNCA, TMPRSS6, MAPT, GSK3B, JUN, APP, CYP1A1, COX17, XIAP, TP53, FOXO1, COA6, ARF1, GPC1, AOC3, SORD, PRNP, F5, ATP7A, SP1, MT-CO1, DBH, SLC11A2, ANG, S100A12, ATP6AP1, ADAM10, MT-CO2, CP, BACE1, PRND, AQP1, MT1X, IL1A, XAF1
35 critical cuproplasia-related genes affecting survival in pan-cancer	CDK1, AP1S1, CASP3, MAP1LC3A, SNCA, TMPRSS6, MAPT, GSK3B, JUN, APP, CYP1A1, COX17, XIAP, FOXO1, ARF1, GPC1, AOC3, SORD, PRNP, ATP7A, SP1, MT-CO1, DBH, SLC11A2, ANG, S100A12, ATP6AP1, ADAM10, MT-CO2, CP, PRND, AQP1, MT1X, IL1A, XAF1
18 critical cuproplasia-related genes expressed highly in tumour condition	CDK1, AP1S1, CASP3, TMPRSS6, GSK3B, APP, COX17, XIAP, ARF1, GPC1, SORD, ATP7A, SP1, MT-CO1, SLC11A2, ATP6AP1, ADAM10, CP
12 critical cuproplasia-related genes expressed lowly in tumour condition	MAP1LC3A, SNCA, MAPT, JUN, CYP1A1, AOC3, PRNP, DBH, S100A12, AQP1, MT1X, XAF1
5 critical cuproplasia-related genes expressed highly or lowly in tumour condition	FOXO1, ANG, MT-CO2, PRND, IL1A

## Sheet: Supplementary Table 6
Supplementary Table 6. Univariate Cox regression analysis for 13 CCGs identified in LGG.
Variable	HR (95% Confidence Interval)	P-value
CASP3	1.86 (1.45-2.38)	8.65e-07
CDK1	1.36 (1.2-1.54)	1.44e-06
CP	1.25 (1.13-1.37)	6.25e-06
CYP1A1	0.757 (0.659-0.869)	7.85e-05
MT-CO1	0.559 (0.417-0.75)	0.000103
ATP7A	1.89 (1.36-2.63)	0.00016
ALB	0.722 (0.599-0.871)	0.000642
SP1	2.15 (1.37-3.36)	0.000794
TP53	1.55 (1.19-2.03)	0.0013
F5	0.913 (0.845-0.986)	0.0212
MAP1LC3A	1.16 (0.958-1.41)	0.127
XIAP	1.3 (0.829-2.02)	0.255
SNCA	0.961 (0.837-1.1)	0.577
